# Supplementary material for: Synthesis of functional polymers by living radical polymerisation
Source: Royal Society of Chemistry journal article supplement (doi:10.1039/b303759b), 2003-01-01
Supplement: b303759b.doc [file b303759b.doc]

Supplementary Experimental Information for ‘Synthesis of Functional Polymers by Living Radical Polymerisation.’

1,1,1-Tris(2’-bromo-2’-methylpropionyloxymethyl)ethane, 2.

Tris(hydroxymethyl)ethane (12.01 g, 100.0 mmol), THF (200 mL), triethylamine (46 mL, 330 mmol) and 2-bromoisobutyryl bromide (40.8 mL, 330 mmol) were reacted as for **1**. The product, a viscous brown oil, crystallised upon cooling in the refrigerator. The product was recrystallised from methanol to give a white crystalline product. Yield = 14.91 g (26 %).

IR (Solid ATR Cell)  (cm-1) 1732 (C=O);

1H NMR (CDCl3, 298K, 250.13 MHz) 1.16 (s, 3H, (OCH2)3CC*H*3), 1.92 (s, 18H, C(C*H*3)2Br), 4.16(s, 6H, CH2); 13C {1H} NMR (CDCl3, 298K, 100.6 MHz) 17.52 (1C, (OCH2)3C*C*H3), 31.14 (6C, C(*C*H3)2Br), 40.10 (1C, (OCH2)3*C*CH3), 55.85 (3C, *C*(CH3)2Br), 67.04 (3C, CH2), 171.57 (3C, C=O); MS (+FAB) (m/z) 570, 568, 566, 564 (mass peaks), 489, 487, 485, 403, 401, 399, 321, 329, 289, 154, 137, 123, 121, 106, 71, 69. Anal. Calcd for C17H27O6Br3: C = 36.01, H = 4.79, Found: C = 36.04, H = 4.72.

**1,3-(2’-bromo-2’-methylpropionyloxy)-2,2-dimethyl propane, 3.** 2,2-Dimethyl-1,3-propanediol (10.44 g, 100.2 mmol), triethylamine (30.8 mL, 224 mmol), tetrahydrofuran (200 mL) and 2-bromoisobutyryl bromide (27.2 mL, 220 mmol) were reacted as for **1**. The dichloromethane layer was dried with MgSO4 and the solvent removed under reduced pressure to give a clear viscous liquid. The product was distilled under vacuum (bp 106 °C/0.01 mmHg) to give 20.6 g (yield 51 %) of **3** as a colourless oil.

IR (Liquid, ATR Cell)  (cm-1) 1733 (C=O);

1H NMR (CDCl3, 298K, 250.13 MHz) 1.04 (s, 6H, (OCH2)2C(C*H*3)2), 1.92 (s, 12H, C(C*H*3)2Br), 3.99(s, 4H, CH2); 13C {1H} NMR (CDCl3, 298K, 100.6 MHz) 22.09 (2C, (OCH2)2C(*C*H3)2), 31.12 (4C, C(*C*H3)2Br), 35.81 (1C, (OCH2)2*C*(CH3)2), 56.08 (2C, *C*(CH3)2Br), 70.49 (2C, CH2), 171.69 (2C, C=O). MS (+CI (NH3)) (m/z) 421, 419, 417, 404, 402, 400, 236, 234, 223, 221, 155, 151, 149, 123, 121, 69. Anal. Calcd for C13H22O4Br2: C = 38.83, H = 5.51, Found: C = 38.84, H = 5.53.

4-[(4-chloro-6-methoxy-1,3,5-triazin-2-yl)amino]phenyl 2-bromo-2-methylpropionate, 5

A solution of 2-bromoisobutyryl bromide (1.0 mL, 7.90 mmol) in 20 mL of THF was added dropwise to a solution of 4-[(4-chloro-6-methoxy-1,3,5-triazin-2-yl)amino]phenol (1.9 g, 7.52 mmol) and triethylamine in 100 mL of THF, at -10 °C. During the additon (ca. 15 min) precipitation of triethylammonium bromide was observed. The reaction was monitored by TLC (SiO2, petroleum ether/ Et2O 1:1, 4-[(4-chloro-6-methoxy -1,3,5-triazin-2-yl)amino]phenol (starting material) Rf = 0.14; 4-[(4-chloro-6-methoxy-1,3,5-triazin-2-yl)amino]phenyl 2-bromo-2-methylpropionate (final product) Rf = 0.26). After 1.5 h the white suspension was poured into a conical flask containing 150 mL of Et2O and the ammonium salt removed by filtration on a sintered glass frit. The solvent was then evaporated at reduced pressure to give a white crude residue that was suspended in 10 mL of pentane and filtered. We obtained 2.56 g (6.37 mmol, yield 85%) of 4-[(4-chloro-6-methoxy-1,3,5-triazin-2-yl)amino]phenyl 2-bromo-2-methylpropionate as a white solid. The 1H NMR analysis (*d*6-DMSO) revealed the presence, in solution, of 2 rotational isomers (molar ratio 7:3).

m.p. 107-108 °C; IR (NH) 3365 cm-1. (C=O) 1747 cm-1.

*Major isomer*: 1H NMR (*d*6-DMSO, 298 K, 400 MHz)  2.05 (s, 6H, C(*C*H3)2Br), 3.96 (s, 3H, OCH3), 7.17 (d, *J =* 8.9 Hz, 2H, CH Ar) , 7.77 (d, *J =* 8.9 Hz, 2H, CH Ar), 10.78 (s, 1H, NH); 13C{1H} NMR (*d*6-DMSO, 298 K, 100.6 MHz)  30.42 (2C, CH3), 55.75 (bs, 1C, OCH3), 57.29 (1C, *C*(CH3)2Br), 121.96 (2C, CH Ar), 122.12 (2C, CH Ar), 136.29 (1C, C Ar), 146.61 (bs, 1C, C Ar), 165.10 (bs, 1C, C Ar), 169.89 (bs, 1C, C Ar), , 170.16 (1C, C=O), 171.33 (bs, 1C, C Ar).

*Minor isomer*: 1H NMR (*d*6-DMSO, 298 K, 400 MHz)  2.05 (s, 6H, C(*C*H3)2Br), 3.96 (s, 3H, OCH3), 7.17 (d, *J =* 8.9 Hz, 2H, CH Ar) , 7.69 (d, *J =* 8.9 Hz, 2H, CH Ar), 10.66 (s, 1H, NH); 13C{1H} NMR (*d*6-DMSO, 298 K, 100.6 MHz)  30.42 (2C, CH3), 55.75 (bs, 1C, OCH3), 57.29 (1C, *C*(CH3)2Br), 121.96 (2C, CH Ar), 122.73 (2C, CH Ar), 136.29 (1C, C Ar), 146.61 (bs, 1C, C Ar), 165.10 (bs, 1C, C Ar), 169.89 (bs, 1C, C Ar), , 170.16 (1C, C=O), 171.33 (bs, 1C, C Ar).

Synthesis of *N*-[2-(2’-bromo-2’-methylpropionyloxy)-ethyl]phthalimide, 6.

*N*-(2-hydroxyethyl)phthalimide (Aldrich, 99%) (19.12 g, 0.1mol) was dissolved in anhydrous THF (250 mL) with triethylamine (28.1 mL, 0.2 mol) under nitrogen in a 500 mL round-bottomed flask equipped with a magnetic stirrer. The flask was cooled to 0°C with an ice bath before the dropwise addition of 2-bromoisobutyryl bromide (13.9 mL, 0.11 mol). The mixture was stirred for 45 minutes and allowed to reach room temperature. Subsequently the reaction mixture was poured into an excess of cold water and extracted with diethyl ether (3  50 mL). The organic layer was washed with a saturated aqueous solution of Na2CO3 (3  50 mL), acidified water (pH = 4.5, 3  50 mL), and again the saturated aqueous solution of Na2CO3 (3  50 mL). The organic layer was dried over anhydrous MgSO4 and filtered. Finally the solvent was removed under reduced pressure by using the rotary evaporator in order to isolate the title compound (30.6 g, yield 90 %) as a yellowish solid.

m.p. 63-65°C, IR (solid, ATR cell)  (cm-1) 1774 (Ccycl=O), 1705 (C=O); 1H NMR (CDCl3, 298 K, 300 MHz)  1.81 (s, 6H, C(C*H*3)2Br), 3.95 (t, 2H, *J*= 5.3 Hz, CH2N), 4.35 (t, 2H, *J* = 5.4 Hz, CH2O), 7.67 (m, 2H, CH Ar), 7.78 (m, 2H, CH Ar). 13C NMR (CDCl3, 298 K, 75 MHz)  31.00 (2C, C(*C*H3)2Br), 37.12 (1C, CH2N), 55.92 (1C, *C*(CH3)2Br), 63.42 (1C, CH2O), 123.78 (2C, CH Ar), 132.35 (1C, CAr), 133.54 (2C, CH Ar), 168.40 (2C, Ccycl=O), 171.87 (1C, C=O).

Synthesis of *N*-(2-bromo-2-methylpropionyloxy) succinimide, 7.

This was prepared from *N*-hydroxysuccinimide (NHS) using a similar procedure to that given above for the synthesis of compound **6**. The solvent used in this case was anhydrous dichloromethane as NHS is insoluble in THF. The title compound was obtained in 85 % yield as a white solid.

m.p. 72-74°C; IR (solid, ATR cell)  (cm-1) 1772 (Ccycl=O), 1728 (C=O); 1H NMR (CDCl3, 298 K, 300 MHz)  2.08 (s, 6H, C(C*H*3)2Br), 2.87 (s, 4H, CH2). 13C NMR (CDCl3, 298 K, 75 MHz)  26.03 (2C, CH2), 31.09 (2C, C(*C*H3)2Br), 51.60 (1C, *C*(CH3)2Br), 167.89 (1C, C=O), 169.02 (2C, Ccycl=O); MS (+EI), (m/z) 266, 265, 156, 151, 149, 123, 121, 116, 115, 91, 87, 70, 69. Anal. Calcd for C8H10NO4Br: C = 36.39; H = 3.82; N = 5.30, Br = 30.26. Found: C = 36.35; H = 3.82; N = 5.03; Br = 30.17.
